# Supplementary material
Source: HighWire-hosted journal article supplement (http://dmd.aspetjournals.org/highwire/filestream/79789/field_highwire_adjunct_files/0/1110_supp_data.pdf)
Supplement: 1110_supp_data.pdf [file 1110_supp_data.pdf]

**DMD-AR-2022-001110R1**

**Supplementary Information**

*Drug Metabolism and Disposition*

**Maternal and Fetal Exposure to (-)- $\Delta^9$ -tetrahydrocannabinol and Its Major Metabolites in Pregnant Mice Is Differentially Impacted by P-glycoprotein (P-gp) and Breast Cancer Resistance Protein (BCRP)**

Xin Chen, Jashvant D. Unadkat, Qingcheng Mao

Department of Pharmaceutics, School of Pharmacy, University of Washington, Seattle,  
Washington 98195

**Supplementary Table 1. The maternal brain, placental, and fetal to maternal plasma AUC<sub>0-∞</sub> GMRs of THC, 11-OH-THC, and THC-COOH**

|                       | AUC <sub>0-∞</sub> GMR<br>(95% CI) | AUC <sub>0-∞</sub> GMR<br>(95% CI) | Adjusted<br><i>P</i> value | AUC <sub>0-∞</sub> GMR<br>(95% CI) | Adjusted<br><i>P</i> value | AUC <sub>0-∞</sub> GMR<br>(95% CI)                      | Adjusted<br><i>P</i> value |
|-----------------------|------------------------------------|------------------------------------|----------------------------|------------------------------------|----------------------------|---------------------------------------------------------|----------------------------|
| <b>THC</b>            | WT                                 | <i>P-gp</i> <sup>-/-</sup>         |                            | <i>Bcrp</i> <sup>-/-</sup>         |                            | <i>P-gp</i> <sup>-/-</sup> / <i>Bcrp</i> <sup>-/-</sup> |                            |
| <b>Maternal brain</b> | 0.55<br>(0.37, 0.84)               | <b>0.16</b><br><b>(0.10, 0.25)</b> | <b>0.0010</b>              | 0.65<br>(0.56, 0.75)               | 0.9348                     | 0.39<br>(0.20, 0.76)                                    | 0.5718                     |
| <b>Placenta</b>       | 0.42<br>(0.27, 0.67)               | 0.37<br>(0.26, 0.53)               | 0.9644                     | 0.64<br>(0.55, 0.75)               | 0.4616                     | 0.82<br>(0.49, 1.39)                                    | 0.1199                     |
| <b>Fetal remains</b>  | 0.30<br>(0.12, 0.80)               | 0.17<br>(0.13, 0.22)               | 0.1939                     | 0.36<br>(0.25, 0.51)               | 0.9246                     | 0.29<br>(0.17, 0.49)                                    | 0.9952                     |
| <b>Fetus</b>          | 0.23<br>(0.09, 0.59)               | 0.21<br>(0.17, 0.25)               | 0.9658                     | 0.26<br>(0.13, 0.52)               | 0.9731                     | 0.22<br>(0.17, 0.29)                                    | 0.9965                     |
| <b>11-OH-THC</b>      | WT                                 | <i>P-gp</i> <sup>-/-</sup>         |                            | <i>Bcrp</i> <sup>-/-</sup>         |                            | <i>P-gp</i> <sup>-/-</sup> / <i>Bcrp</i> <sup>-/-</sup> |                            |
| <b>Maternal brain</b> | 1.18<br>(1.00, 1.40)               | 0.94<br>(0.66, 1.34)               | 0.5721                     | 1.44<br>(0.96, 2.17)               | 0.6695                     | <b>0.67</b><br><b>(0.48, 0.94)</b>                      | <b>0.0302</b>              |
| <b>Placenta</b>       | 1.49<br>(1.28, 1.73)               | 1.34<br>(0.73, 2.48)               | 0.9327                     | 1.54<br>(1.34, 1.77)               | 0.9967                     | 1.08<br>(0.82, 1.43)                                    | 0.3175                     |
| <b>Fetal remains</b>  | 1.38<br>(1.16, 1.63)               | 0.91<br>(0.08, 10.11)              | 0.1441                     | 1.19<br>(0.79, 1.80)               | 0.8318                     | <b>0.67</b><br><b>(0.51, 0.86)</b>                      | <b>0.0037</b>              |
| <b>Fetus</b>          | 1.45<br>(1.03, 2.05)               | <b>0.52</b><br><b>(0.44, 0.61)</b> | <b>&lt;0.0001</b>          | 1.09<br>(0.65, 1.83)               | 0.3958                     | <b>0.48</b><br><b>(0.37, 0.63)</b>                      | <b>&lt;0.0001</b>          |
| <b>THC-COOH</b>       | WT                                 | <i>P-gp</i> <sup>-/-</sup>         |                            | <i>Bcrp</i> <sup>-/-</sup>         |                            | <i>P-gp</i> <sup>-/-</sup> / <i>Bcrp</i> <sup>-/-</sup> |                            |
| <b>Maternal brain</b> | 0.32<br>(0.23, 0.43)               | 0.43<br>(0.18, 1.01)               | 0.6948                     | 0.20<br>(0.14, 0.28)               | 0.3225                     | 0.21<br>(0.14, 0.32)                                    | 0.4710                     |
| <b>Placenta</b>       | 1.34<br>(0.91, 1.99)               | 1.11<br>(0.85, 1.45)               | 0.8866                     | 0.95<br>(0.65, 1.38)               | 0.5840                     | 0.79<br>(0.71, 0.89)                                    | 0.2620                     |
| <b>Fetal remains</b>  | 1.04<br>(0.58, 1.85)               | 1.13<br>(0.45, 2.84)               | 0.9874                     | 0.57<br>(0.36, 0.92)               | 0.1873                     | <b>0.42</b><br><b>(0.35, 0.50)</b>                      | <b>0.0223</b>              |
| <b>Fetus</b>          | 1.00<br>(0.49, 2.05)               | <b>0.38</b><br><b>(0.24, 0.59)</b> | <b>0.0136</b>              | 0.48<br>(0.18, 1.29)               | 0.0830                     | <b>0.37</b><br><b>(0.31, 0.44)</b>                      | <b>0.0106</b>              |

Data shown are the bootstrapped tissue/maternal plasma AUC<sub>0-∞</sub> GMRs of THC, 11-OH-THC, THC-COOH after retro-orbital injection of THC (3 mg/kg) to pregnant mice on gestation day 18 over 240 min. Data are reported as geometric mean ratio (GMR) (95% confidence interval) (n = 3). Differences in AUC<sub>0-∞</sub> GMRs between WT and *P-gp*<sup>-/-</sup>, *Bcrp*<sup>-/-</sup>, or *P-gp*<sup>-/-</sup>/*Bcrp*<sup>-/-</sup> pregnant mice were analyzed by two-way ANOVA followed by the Dunnett's *post hoc* test. Differences indicated in bold were statistically significant with *p* values of < 0.05 that were adjusted for multiple comparisons.

**Supplementary Table 2. The percentages of extrapolation of tissue AUCs**

| <b>THC<br/>Extrapolation%</b> | <b>WT</b> | <b><i>P-gp</i><sup>-/-</sup></b> | <b><i>Bcrp</i><sup>-/-</sup></b> | <b><i>P-gp</i><sup>-/-</sup>/<i>Bcrp</i><sup>-/-</sup></b> |
|-------------------------------|-----------|----------------------------------|----------------------------------|------------------------------------------------------------|
| Maternal brain                | 6.65      | 3.29                             | 2.31                             | 11.35                                                      |
| Placenta                      | 19.05     | 26.66                            | 5.88                             | 36.70                                                      |
| Fetal remains                 | 37.80     | 20.88                            | 24.89                            | 32.41                                                      |
| Fetus                         | 31.81     | 22.12                            | 17.67                            | 29.64                                                      |

  

| <b>11-OH-THC<br/>Extrapolation%</b> | <b>WT</b> | <b><i>P-gp</i><sup>-/-</sup></b> | <b><i>Bcrp</i><sup>-/-</sup></b> | <b><i>P-gp</i><sup>-/-</sup>/<i>Bcrp</i><sup>-/-</sup></b> |
|-------------------------------------|-----------|----------------------------------|----------------------------------|------------------------------------------------------------|
| Maternal brain                      | 5.47      | 27.26                            | 8.96                             | 11.49                                                      |
| Placenta                            | 17.71     | 36.58                            | 10.13                            | 10.19                                                      |
| Fetal remains                       | 25.00     | 30.26                            | 22.03                            | 8.71                                                       |
| Fetus                               | 29.76     | 8.34                             | 14.87                            | 4.08                                                       |

  

| <b>THC-COOH<br/>Extrapolation%</b> | <b>WT</b> | <b><i>P-gp</i><sup>-/-</sup></b> | <b><i>Bcrp</i><sup>-/-</sup></b> | <b><i>P-gp</i><sup>-/-</sup>/<i>Bcrp</i><sup>-/-</sup></b> |
|------------------------------------|-----------|----------------------------------|----------------------------------|------------------------------------------------------------|
| Maternal brain                     | 31.86     | 57.40                            | 14.38                            | 17.40                                                      |
| Placenta                           | 44.35     | 44.53                            | 20.37                            | 21.61                                                      |
| Fetal remains                      | 55.46     | 71.39                            | 40.85                            | 28.53                                                      |
| Fetus                              | 56.57     | 42.24                            | 43.96                            | 28.25                                                      |

Data shown are the percentages of extrapolation of the tissue AUCs of THC, 11-OH-THC, THC-COOH in WT, *P-gp*<sup>-/-</sup>, *Bcrp*<sup>-/-</sup>, and *P-gp*<sup>-/-</sup>/*Bcrp*<sup>-/-</sup> pregnant mice. Data are calculated by  $1 - (\text{AUC}_{0-240}) / (\text{AUC}_{0-\infty})$ , and reported as mean.

**Supplementary Table 3. Metabolite to parent maternal plasma AUC molar ratios**

| <b>Molar ratio</b>        | <b>WT</b>   | <b><i>P-gp</i><sup>-/-</sup></b> | <b><i>Bcrp</i><sup>-/-</sup></b> | <b><i>P-gp</i><sup>-/-</sup>/<i>Bcrp</i><sup>-/-</sup></b> |
|---------------------------|-------------|----------------------------------|----------------------------------|------------------------------------------------------------|
| <b>11-OH-THC/THC</b>      | 0.14 ± 0.05 | 0.08 ± 0.01                      | 0.14 ± 0.02                      | 0.14 ± 0.03                                                |
| <b>THC-COOH/11-OH-THC</b> | 2.83 ± 0.40 | 2.89 ± 0.30                      | 3.02 ± 0.32                      | 2.91 ± 0.27                                                |

Data shown are metabolite to parent maternal plasma AUC molar ratios in WT, *P-gp*<sup>-/-</sup>, *Bcrp*<sup>-/-</sup>, and *P-gp*<sup>-/-</sup>/*Bcrp*<sup>-/-</sup> pregnant mice. Data are reported as mean ± SD (n = 3). Differences among the four mouse groups were analyzed by ANOVA and were considered statistically significant with *p* values of < 0.05. No statistically significant differences were found.

**Supplementary Figure 1. Unnormalized maternal plasma concentration-time profiles of THC, 11-OH-THC and THC-COOH.**

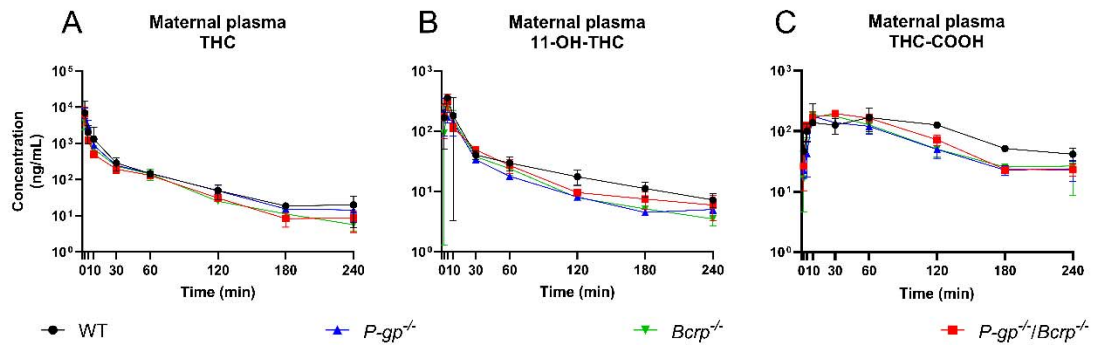

Maternal plasma concentration-time profiles of THC (A), 11-OH-THC (B), and THC-COOH (C) over 240 min after retro-orbital injection of 3 mg/kg THC to pregnant wild-type (●), *P-gp*<sup>-/-</sup> (▲), *Bcrp*<sup>-/-</sup> (▼), and *P-gp*<sup>-/-</sup>/*Bcrp*<sup>-/-</sup> (■) mice on gestation day 18. Data shown are mean ± SD (n = 3 at each time point).
